# Supplementary material for: Assessment of cardiovascular risk in Tunisia: applying the Framingham risk score to national survey data
Source: PubMed Central journal article supplement — BMJ Open. 2016 Nov 30;6(11):e009195. doi: 10.1136/bmjopen-2015-009195 (PMC5168513; doi:10.1136/bmjopen-2015-009195), 2016-11-30
Supplement: bmjopen-2015-009195supp_appendix.pdf [file bmjopen-2015-009195supp_appendix.pdf]

## Appendix: Simple Office-based non-laboratory Predictors of CVD Regression Coefficients and Hazard Ratios

Source: The Framingham Heart Study. General cardiovascular disease (10 year risk)

<http://www.framinghamheartstudy.org/risk/gen cardio.html#>

| Men* (10-year Baseline Survival: So(10) = 0.88431)   |         |         |              |                |
|------------------------------------------------------|---------|---------|--------------|----------------|
| Variable                                             | Beta**  | p-value | Hazard Ratio | 95% CI         |
| Log of Age                                           | 3.11296 | <.0001  | 22.49        | (14.80, 34.16) |
| Log of Body Mass Index                               | 0.79277 | <.0066  | 2.21         | (1.25, 3.91)   |
| Log of SBP if not treated                            | 1.85508 | <.0001  | 6.39         | (3.61, 11.33)  |
| Log of SBP if treated                                | 1.92672 | <.0001  | 6.87         | (3.90, 12.08)  |
| Smoking                                              | 0.70953 | <.0001  | 2.03         | (1.75, 2.37)   |
| Diabetes                                             | 0.53160 | <.0001  | 1.70         | (1.37, 2.11)   |
| Women* (10-year Baseline Survival: So(10) = 0.94833) |         |         |              |                |
| Variable                                             | Beta**  | p-value | Hazard Ratio | 95% CI         |
| Log of Age                                           | 2.72107 | <.0001  | 15.20        | (8.59, 26.87)  |
| Log of Body Mass Index                               | 0.51125 | <.0609  | 1.67         | (0.98, 2.85)   |
| Log of SBP if not treated                            | 2.81291 | <.0001  | 16.66        | (8.27, 33.54)  |
| Log of SBP if treated                                | 2.88267 | <.0001  | 17.86        | (8.97, 35.57)  |
| Smoking                                              | 0.61868 | <.0001  | 1.86         | (1.53, 2.25)   |
| Diabetes                                             | 0.77763 | <.0001  | 2.18         | (1.63, 2.91)   |

\* The 10-year risk for women can be calculated as  $1 - 0.94833 \exp(\sum \beta X - 26.0145)$  where  $\beta$  is the regression coefficient and X is the level for each risk factor; the risk for men is given as  $1 - 0.88431 \exp(\sum \beta X - 23.9388)$

\*\*Estimated regression coefficient
